# Supplementary material for: E/Z photoisomerization pathway in pristine and fluorinated di(3-furyl)ethenes
Source: Royal Society of Chemistry journal article supplement (doi:10.1039/d2cp02563a), 2022-01-01
Supplement: d2cp02563a1.pdf [file d2cp02563a1.pdf]

## E/Z photoisomerization pathway in pristine and fluorinated di(3-furyl)ethenes

S. M. Sudarkova, I. N. Ioffe

Supporting information contains the Cartesian coordinates of the key points in the S<sub>1</sub> state of the pristine and fluorinated di(3-furyl)ethenes (3DFE), obtained at the XMCQDPT2 level of theory, as well as schematic representations of S<sub>1</sub> surface of 2F-3DFE and 8F-3DFE along the E/Z photoisomerization path (XMCQDPT2 data).

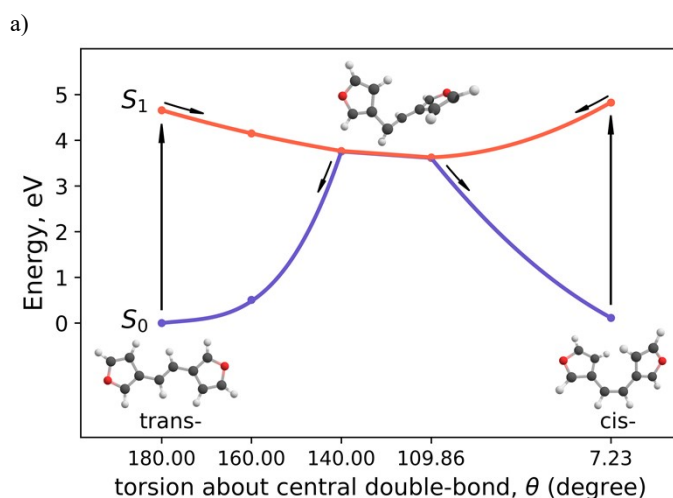

**Fig. 3. a)** Key points of the S<sub>0</sub> and S<sub>1</sub> potential energy surfaces in 3DFE along the E/Z isomerization pathway in S<sub>1</sub>, obtained at the XMCQDPT2 level of theory.

**Table S1.** Cartesian coordinates of the key points in the S<sub>1</sub> state of 3DFE, see Fig. 3a of the main text.

| 180.00 degrees of torsion angle |              |              |              | 160.00 degrees of torsion angle |              |              |              |
|---------------------------------|--------------|--------------|--------------|---------------------------------|--------------|--------------|--------------|
| C                               | 0.522498927  | -1.287441166 | -2.038567570 | C                               | 0.433164731  | -1.482732508 | -2.040955883 |
| C                               | -0.250389949 | -0.267945085 | -2.692603031 | C                               | -0.584271862 | -0.699432148 | -2.718575399 |
| C                               | 0.173564733  | -0.231247260 | -3.973163652 | C                               | -0.264358848 | -0.699028249 | -4.042872593 |
| O                               | 1.150413303  | -1.143223416 | -4.181933272 | O                               | 0.892778552  | -1.416895968 | -4.273336974 |
| C                               | 1.350601285  | -1.773292768 | -3.006025168 | C                               | 1.307054154  | -1.885513998 | -3.075325602 |
| H                               | -1.018845093 | 0.352587955  | -2.261749152 | H                               | -1.442195432 | -0.228451764 | -2.267773476 |
| H                               | -0.107452568 | 0.363079745  | -4.826008152 | H                               | -0.712242085 | -0.267913202 | -4.920130142 |
| C                               | 0.377737892  | -2.719030101 | 2.305004188  | C                               | -0.019348790 | -3.007934576 | 2.066974375  |
| C                               | -0.395151438 | -1.699534420 | 1.650968534  | C                               | -0.575291147 | -1.768212995 | 1.557877365  |
| C                               | -1.223260417 | -1.213689384 | 2.618423733  | C                               | -1.349999790 | -1.269870938 | 2.627710239  |
| O                               | -1.023075745 | -1.843761969 | 3.794330680  | O                               | -1.297060508 | -2.098053239 | 3.695055947  |
| C                               | -0.046222633 | -2.755733648 | 3.585562693  | C                               | -0.485873236 | -3.157287282 | 3.337860399  |
| H                               | 1.146200054  | -3.339556171 | 1.874152800  | H                               | 0.619827547  | -3.694254085 | 1.535993929  |
| H                               | 0.234792790  | -3.350062476 | 4.438406543  | H                               | -0.357553827 | -3.906454602 | 4.098490833  |
| C                               | 0.472190779  | -1.735450286 | -0.666060844 | C                               | 0.529426683  | -1.772744201 | -0.670141617 |
| C                               | -0.344841817 | -1.251523882 | 0.278462325  | C                               | -0.385125416 | -1.194267212 | 0.289911198  |
| H                               | 1.164546309  | -2.531058658 | -0.405895030 | H                               | 1.339943644  | -2.402745453 | -0.314183461 |
| H                               | -1.037197174 | -0.455915337 | 0.018296612  | H                               | -0.894916797 | -0.266972037 | 0.042559983  |
| H                               | -1.979286145 | -0.446368136 | 2.611088671  | H                               | -1.936336100 | -0.372780850 | 2.747672822  |
| H                               | 2.106626101  | -2.540614918 | -2.998690493 | H                               | 2.219549641  | -2.460053783 | -3.075076384 |
| 140.00 degrees of torsion angle |              |              |              | 109.86 degrees of torsion angle |              |              |              |
| C                               | 0.352520724  | -1.748985635 | -2.083992179 | C                               | 0.252413447  | -2.300107045 | -1.865084617 |
| C                               | -0.935944894 | -1.733020742 | -2.737203748 | C                               | -1.103031983 | -2.722987841 | -2.195641562 |
| C                               | -0.701675905 | -1.454061048 | -4.059066263 | C                               | -1.239371820 | -2.593258478 | -3.547254622 |

|   |              |              |              |   |              |              |              |
|---|--------------|--------------|--------------|---|--------------|--------------|--------------|
| O | 0.630161897  | -1.301804085 | -4.295310998 | O | -0.087444151 | -2.122118615 | -4.108342538 |
| C | 1.260155395  | -1.474101676 | -3.085646426 | C | 0.792360512  | -1.909462067 | -3.082806713 |
| H | -1.896038216 | -1.919694025 | -2.281895369 | H | -1.844597011 | -3.115359496 | -1.517924857 |
| H | -1.339560261 | -1.338738598 | -4.916663119 | H | -2.042538468 | -2.790458819 | -4.234514278 |
| C | -0.744721094 | -3.334492919 | 1.817801448  | C | -1.008233193 | -3.471085205 | 1.605105784  |
| C | -0.607298349 | -1.929473782 | 1.506125608  | C | -1.002147715 | -2.122450828 | 1.070600342  |
| C | -1.146212169 | -1.248750208 | 2.586077433  | C | -2.083814617 | -1.486715711 | 1.661785652  |
| O | -1.598416577 | -2.100675118 | 3.511615702  | O | -2.719882056 | -2.308105373 | 2.497469156  |
| C | -1.344444648 | -3.388861947 | 3.029156300  | C | -2.051124964 | -3.528586889 | 2.455104425  |
| H | -0.407774053 | -4.141607626 | 1.191067003  | H | -0.298733268 | -4.236331855 | 1.342942057  |
| H | -1.657934754 | -4.179944870 | 3.684729150  | H | -2.471851169 | -4.287903588 | 3.088216053  |
| C | 0.624097817  | -2.090119576 | -0.669675751 | C | 0.926516787  | -2.384398196 | -0.525829291 |
| C | -0.058270556 | -1.338192600 | 0.346269492  | C | -0.097737323 | -1.573008447 | 0.139657235  |
| H | 1.534331094  | -1.432186911 | -0.439490615 | H | 1.851454085  | -1.792999223 | -0.597976496 |
| H | -0.076557098 | -0.233069602 | 0.359305324  | H | -0.305603112 | -0.528579110 | -0.145269386 |
| H | -1.250814563 | -0.198313454 | 2.802537162  | H | -2.482115391 | -0.490121546 | 1.567102460  |
| H | 2.333935802  | -1.406758893 | -3.104784546 | H | 1.774476249  | -1.575961110 | -3.368878311 |

7.23 degrees of torsion angle

|   |              |              |              |
|---|--------------|--------------|--------------|
| C | 0.080909525  | -2.731504017 | -1.794581075 |
| C | -1.166887763 | -3.204856853 | -2.328433350 |
| C | -0.856605851 | -4.037117573 | -3.345070565 |
| O | 0.484781343  | -4.127946375 | -3.497219611 |
| C | 1.035675320  | -3.328160487 | -2.563781610 |
| H | -2.157517073 | -2.932858165 | -2.006266197 |
| H | -1.450425787 | -4.611221296 | -4.035854425 |
| C | -2.209007504 | -3.243040827 | 0.683728607  |
| C | -1.645289106 | -1.925879378 | 0.799974868  |
| C | -2.516239734 | -1.245266327 | 1.598402030  |
| O | -3.557942245 | -2.019038107 | 1.959776259  |
| C | -3.353060411 | -3.233808893 | 1.400287785  |
| H | -1.793554822 | -4.084260605 | 0.155637791  |
| H | -4.097878862 | -3.982480523 | 1.610399961  |
| C | 0.354416656  | -1.762986363 | -0.747923005 |
| C | -0.392498942 | -1.387301426 | 0.301045563  |
| H | 1.305319496  | -1.250139027 | -0.858505033 |
| H | 0.004693164  | -0.569615575 | 0.895228579  |
| H | -2.519488808 | -0.235352371 | 1.973668434  |
| H | 2.111821426  | -3.277057431 | -2.554403188 |

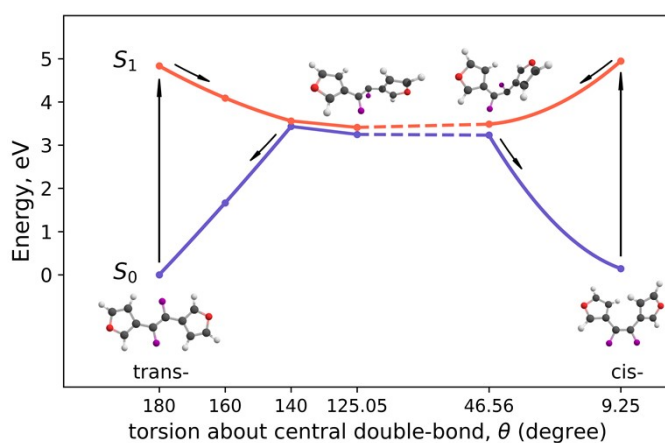

**Fig. S1.** Schematic representation of  $S_1$  surface of 2F-3DFE along the E/Z photoisomerization path (XMCQDPT2 data). Vertical excitation is followed by, relaxation in the  $S_1$  state, which leads to the two different  $S_0/S_1$  intersection domains, depending on the starting isomer, E or Z.

**Table S2.** Cartesian coordinates of the key points in the  $S_1$  state of 2F-3DFE, see Fig. S1.

| 180.00 degrees of torsion angle |              |              | 160.00 degrees of torsion angle |   |              |              |              |
|---------------------------------|--------------|--------------|---------------------------------|---|--------------|--------------|--------------|
| C                               | 0.515769451  | -1.269303241 | -2.069771200                    | C | 0.362427850  | -1.551530128 | -2.098948103 |
| C                               | -0.247084397 | -0.254654617 | -2.740122053                    | C | -0.773414318 | -1.047790673 | -2.835715492 |
| C                               | 0.196809021  | -0.239999951 | -4.014588872                    | C | -0.364689004 | -0.937282258 | -4.127212036 |
| O                               | 1.171954692  | -1.159447121 | -4.195901492                    | O | 0.952642088  | -1.336960544 | -4.262355968 |
| C                               | 1.358009883  | -1.776759112 | -3.015305602                    | C | 1.372895506  | -1.713940615 | -3.037599210 |
| C                               | 0.393970678  | -2.745089201 | 2.333697152                     | C | -0.360486061 | -3.212123173 | 1.971517883  |
| C                               | -0.368888398 | -1.730445360 | 1.663344923                     | C | -0.634417563 | -1.860134504 | 1.542990963  |
| C                               | -1.211136126 | -1.222997200 | 2.608876933                     | C | -1.152124265 | -1.214061260 | 2.657608683  |
| O                               | -1.025080756 | -1.840309633 | 3.789472590                     | O | -1.195900788 | -2.048713863 | 3.717111951  |
| C                               | -0.049927446 | -2.759749145 | 3.608162254                     | C | -0.714857290 | -3.270120439 | 3.282836142  |
| C                               | 0.464748736  | -1.714915029 | -0.703210500                    | C | 0.442434523  | -1.834913423 | -0.713407041 |
| C                               | -0.317866409 | -1.284832206 | 0.296784746                     | C | -0.433748077 | -1.299000210 | 0.257407968  |
| H                               | -1.015595470 | 0.369036982  | -2.319386290                    | H | -1.738368249 | -0.795388790 | -2.428880946 |
| H                               | -0.069890461 | 0.343766404  | -4.878903312                    | H | -0.836151295 | -0.607791279 | -5.035280327 |
| H                               | 2.108298097  | -2.546924866 | -2.982909404                    | H | 2.392061913  | -2.050940164 | -2.955715261 |
| H                               | -1.961429575 | -0.452836603 | 2.576479303                     | H | -1.487998767 | -0.204269836 | 2.820215698  |
| H                               | 1.162488584  | -3.368773839 | 1.912963548                     | H | 0.058241669  | -4.001568836 | 1.369934855  |
| H                               | 0.216772806  | -3.343515265 | 4.472476620                     | H | -0.692821347 | -4.043069083 | 4.029593287  |
| F                               | 1.336626135  | -2.702197403 | -0.420758999                    | F | 1.756825292  | -2.153720220 | -0.315035494 |
| F                               | -1.189744683 | -0.297550658 | 0.014332905                     | F | -0.651371504 | 0.094857149  | 0.248354762  |
| 140.00 degrees of torsion angle |              |              | 125.05 degrees of torsion angle |   |              |              |              |
| C                               | 0.390368125  | -1.785273593 | -2.031198120                    | C | 0.168604714  | -2.251215801 | -2.010140954 |
| C                               | -0.867560924 | -1.944511173 | -2.720406825                    | C | -1.072396180 | -2.663205467 | -2.621810705 |
| C                               | -0.680718899 | -1.458003633 | -3.983151035                    | C | -0.977689181 | -2.342417378 | -3.947657062 |
| O                               | 0.593471458  | -1.022216752 | -4.155436695                    | O | 0.230942181  | -1.781064697 | -4.229147438 |
| C                               | 1.233855587  | -1.211643754 | -2.949430434                    | C | 0.912155322  | -1.703595209 | -3.037191894 |
| C                               | -0.662847376 | -3.334406946 | 1.874589448                     | C | -1.104263517 | -3.454765314 | 1.790804906  |
| C                               | -0.596777977 | -1.947077798 | 1.485972619                     | C | -1.067731501 | -2.106446253 | 1.276462464  |
| C                               | -1.230677245 | -1.226002039 | 2.497940258                     | C | -1.960712333 | -1.373062786 | 2.055341767  |
| O                               | -1.663587252 | -2.042815277 | 3.442645076                     | O | -2.518586180 | -2.146972621 | 2.971723118  |
| C                               | -1.312667543 | -3.350078557 | 3.065148941                     | C | -1.987781039 | -3.434670125 | 2.814019071  |
| C                               | 0.703718382  | -2.261565659 | -0.675269435                    | C | 0.577344973  | -2.494956628 | -0.617584455 |
| C                               | 0.005268661  | -1.425348825 | 0.326270414                     | C | -0.279086016 | -1.628840304 | 0.220064681  |
| H                               | -1.773826476 | -2.384839285 | -2.335104262                    | H | -1.902917873 | -3.157694722 | -2.143023682 |
| H                               | -1.325965132 | -1.373126979 | -4.839900827                    | H | -1.644043193 | -2.461718974 | -4.783487541 |
| H                               | 2.274095101  | -0.944443412 | -2.920965546                    | H | 1.916119052  | -1.324730269 | -3.090286951 |
| H                               | -1.420959684 | -0.174141033 | 2.631975850                     | H | -2.266292898 | -0.340310984 | 2.032454222  |
| H                               | -0.259080949 | -4.150399351 | 1.302077127                     | H | -0.528992083 | -4.275139087 | 1.399871958  |
| H                               | -1.611659979 | -4.108011790 | 3.764434066                     | H | -2.366648967 | -4.159127007 | 3.510171535  |
| F                               | 2.050406805  | -1.804284517 | -0.308397724                    | F | 1.896817524  | -1.974932307 | -0.392863323 |
| F                               | -0.046629865 | -0.112401840 | 0.256853179                     | F | -0.435741568 | -0.331917450 | -0.002640081 |
| 46.56 degrees of torsion angle  |              |              | 9.25 degrees of torsion angle   |   |              |              |              |
| C                               | 0.207719946  | -2.631827276 | -1.510469807                    | C | 0.204617890  | -2.756121368 | -1.702307993 |
| C                               | -1.139067625 | -2.676376073 | -2.039395576                    | C | -1.030439316 | -3.188056541 | -2.291454605 |
| C                               | -1.062038183 | -3.396467486 | -3.171570596                    | C | -0.696871184 | -4.090150259 | -3.238595301 |
| O                               | 0.255949364  | -3.819707514 | -3.398427153                    | O | 0.644734094  | -4.251190749 | -3.295282640 |
| C                               | 0.987494091  | -3.353661684 | -2.402149005                    | C | 1.179833833  | -3.438493300 | -2.366515376 |
| C                               | -1.560114147 | -3.079079422 | 1.487552297                     | C | -2.167327249 | -3.114517506 | 0.692713823  |
| C                               | -1.404798230 | -1.775273935 | 0.886218672                     | C | -1.623763663 | -1.787174952 | 0.734972567  |
| C                               | -2.692971421 | -1.275117104 | 0.760672945                     | C | -2.542734828 | -1.041867278 | 1.411618967  |
| O                               | -3.615234528 | -2.171818862 | 1.269569743                     | O | -3.596489776 | -1.796390688 | 1.771507150  |
| C                               | -2.909031899 | -3.258295415 | 1.686240248                     | C | -3.356393937 | -3.051432945 | 1.328456075  |
| C                               | 0.648715639  | -1.972315940 | -0.357350692                    | C | 0.453017943  | -1.747928384 | -0.697323277 |
| C                               | -0.143191184 | -1.118097831 | 0.562972143                     | C | -0.345290229 | -1.292088055 | 0.278003644  |
| H                               | -2.004501241 | -2.222916215 | -1.586623617                    | H | -2.023454253 | -2.851470809 | -2.047401265 |
| H                               | -1.763971499 | -3.716759785 | -3.918617997                    | H | -1.274161149 | -4.672572251 | -3.936042704 |
| H                               | 2.040037346  | -3.584027782 | -2.418797906                    | H | 2.253281786  | -3.427695901 | -2.292265661 |
| H                               | -3.083212261 | -0.322799664 | 0.451575008                     | H | -2.562886656 | -0.007794052 | 1.708768711  |
| H                               | -0.778228350 | -3.765361156 | 1.774023149                     | H | -1.715755234 | -3.991427117 | 0.261376054  |
| H                               | -3.486813028 | -4.061073073 | 2.109123791                     | H | -4.112531993 | -3.785058347 | 1.549727803  |
| F                               | 1.927701078  | -2.109714077 | -0.126141092                    | F | 1.670605967  | -1.186186291 | -0.797363280 |
| F                               | -0.384060177 | -0.019276203 | -0.359765259                    | F | 0.090950214  | -0.225700641 | 0.971262067  |

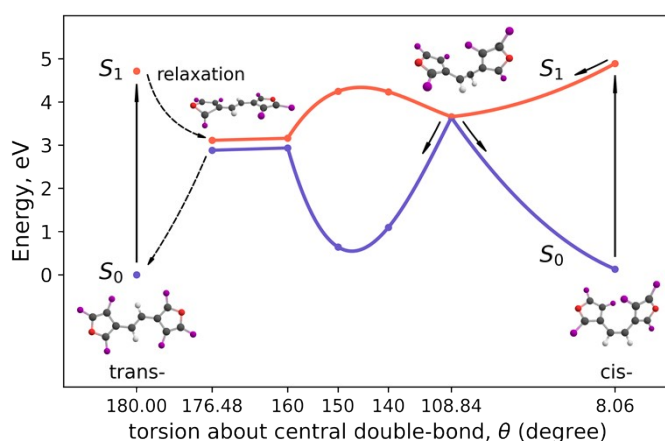

**Fig. 4.** Key points of the  $S_0$  and  $S_1$  surfaces in 6F-3DFE along the E/Z isomerization pathway in  $S_1$ , obtained at the XMCQDPT2 level of theory.

**Table S3.** Cartesian coordinates of the key points in the  $S_1$  state of 6F-3DFE, see Fig. 4 of the main text.

| 180.00 degrees of torsion angle |              |              | 176.48 degrees of torsion angle |   |              |              |              |
|---------------------------------|--------------|--------------|---------------------------------|---|--------------|--------------|--------------|
| C                               | 0.515071168  | -1.278157567 | -2.044046975                    | C | 0.542819664  | -1.380369876 | -1.957221861 |
| C                               | -0.248201107 | -0.257771949 | -2.727236278                    | C | -0.072531219 | -0.341291439 | -2.661196802 |
| C                               | 0.173436879  | -0.220655039 | -4.001737360                    | C | 0.068807306  | -0.603387596 | -4.024422319 |
| O                               | 1.150094369  | -1.133401982 | -4.207309815                    | O | 0.712708950  | -1.736158436 | -4.316333419 |
| C                               | 1.326736170  | -1.741344748 | -3.027061388                    | C | 1.477502465  | -1.942850314 | -3.054063968 |
| C                               | 0.375368915  | -2.721782375 | 2.319643973                     | C | 0.250151528  | -2.826153585 | 2.349743945  |
| C                               | -0.387961395 | -1.701458506 | 1.636439437                     | C | -0.388666430 | -1.704598601 | 1.688857601  |
| C                               | -1.199596151 | -1.238234343 | 2.619462815                     | C | -1.156648010 | -1.170810036 | 2.696472628  |
| O                               | -1.022899447 | -1.846131474 | 3.799728955                     | O | -1.061506241 | -1.827828181 | 3.872579929  |
| C                               | -0.046221985 | -2.758857205 | 3.594164163                     | C | -0.185660058 | -2.847505442 | 3.633931891  |
| C                               | 0.472440317  | -1.732009549 | -0.677230313                    | C | 0.488572352  | -1.825707247 | -0.632258187 |
| C                               | -0.345301829 | -1.247559348 | 0.269632111                     | C | -0.284393573 | -1.221948445 | 0.345391086  |
| H                               | 1.168214884  | -2.526161962 | -0.432744931                    | H | 1.088489644  | -2.692964909 | -0.389354969 |
| H                               | -1.041082643 | -0.453406850 | 0.025172372                     | H | -0.859502122 | -0.337261289 | 0.103086676  |
| F                               | -1.190399895 | 0.498688826  | -2.187135218                    | F | -0.749413700 | 0.709755537  | -2.197951633 |
| F                               | -0.161373421 | 0.494834622  | -5.037972515                    | F | -0.224996193 | 0.205528391  | -5.007647824 |
| F                               | 2.242910249  | -2.669855898 | -3.021445664                    | F | 2.555120968  | -1.118916205 | -3.132489221 |
| F                               | 1.317554809  | -3.478261409 | 1.779544585                     | F | 1.109984071  | -3.675492168 | 1.795467562  |
| F                               | 0.288652411  | -3.474299778 | 4.630417337                     | F | 0.066271850  | -3.627015149 | 4.654526118  |
| F                               | -2.115785222 | -0.309732859 | 2.613843405                     | F | -1.965860025 | -0.139594562 | 2.703736991  |
| 160.00 degrees of torsion angle |              |              | 150.00 degrees of torsion angle |   |              |              |              |
| C                               | 0.388266908  | -1.587592326 | -2.020623844                    | C | 0.349566111  | -1.596967294 | -2.083364346 |
| C                               | -0.322426146 | -0.622729630 | -2.746586276                    | C | -0.678650314 | -0.904837061 | -2.831680613 |
| C                               | -0.291923265 | -0.988959933 | -4.090125626                    | C | -0.310719843 | -0.890934677 | -4.141263769 |
| O                               | 0.368350193  | -2.119431328 | -4.352419935                    | O | 0.874861549  | -1.558079976 | -4.338162224 |
| C                               | 1.246496862  | -2.208386749 | -3.151807874                    | C | 1.213720398  | -2.014879437 | -3.114779371 |
| C                               | -0.024264461 | -3.082955747 | 2.222662167                     | C | -0.203525037 | -3.125383656 | 2.046530945  |
| C                               | -0.528274754 | -1.871027908 | 1.605959396                     | C | -0.661265857 | -1.864977098 | 1.500463260  |
| C                               | -1.347929713 | -1.363259450 | 2.587322357                     | C | -1.450787962 | -1.371364332 | 2.558127232  |
| O                               | -1.411824347 | -2.122606338 | 3.702551932                     | O | -1.412635549 | -2.127273750 | 3.674980385  |
| C                               | -0.582766335 | -3.178753448 | 3.454888075                     | C | -0.651029297 | -3.217703426 | 3.327865323  |
| C                               | 0.469803847  | -1.924298540 | -0.670498735                    | C | 0.510098662  | -1.801582861 | -0.700318635 |
| C                               | -0.279313927 | -1.299361519 | 0.319157312                     | C | -0.397859430 | -1.238321233 | 0.268301130  |
| H                               | 1.070238325  | -2.791922839 | -0.427388182                    | H | 1.344692271  | -2.412400611 | -0.371721339 |
| H                               | -0.829096938 | -0.397856450 | 0.078793552                     | H | -0.909892366 | -0.305720065 | 0.054493502  |
| F                               | -0.985622625 | 0.446147856  | -2.305060356                    | F | -1.780747353 | -0.351047369 | -2.333251439 |
| F                               | -0.716651142 | -0.280321312 | -5.102204601                    | F | -0.898484575 | -0.467044290 | -5.229579132 |
| F                               | 2.284809670  | -1.365699631 | -3.386919433                    | F | 2.431538619  | -2.487656836 | -3.020812095 |
| F                               | 0.830850126  | -3.941737128 | 1.675903607                     | F | 0.547406496  | -4.029782457 | 1.423791609  |
| F                               | -0.475638060 | -4.052384911 | 4.423330716                     | F | -0.584225080 | -4.160353516 | 4.231458412  |
| F                               | -2.098111304 | -0.288573873 | 2.606761454                     | F | -1.933396325 | -0.165311199 | 2.725409047  |

| 140.00 degrees of torsion angle |              |              |              | 108.84 degrees of torsion angle |              |              |              |
|---------------------------------|--------------|--------------|--------------|---------------------------------|--------------|--------------|--------------|
| C                               | 0.322861546  | -1.670026415 | -2.079233593 | C                               | -0.163982501 | -1.856644082 | -1.931244853 |
| C                               | -0.814350659 | -1.153416193 | -2.817812372 | C                               | -1.303896322 | -1.973250609 | -2.838987067 |
| C                               | -0.500469518 | -1.182230640 | -4.139032840 | C                               | -0.895792333 | -2.736157020 | -3.877615387 |
| O                               | 0.753059218  | -1.708791643 | -4.345216727 | O                               | 0.432020695  | -3.138404155 | -3.715041009 |
| C                               | 1.195197144  | -2.031650232 | -3.113172270 | C                               | 0.820753284  | -2.608303641 | -2.572751284 |
| C                               | -0.424665262 | -3.228244349 | 1.911246888  | C                               | -1.571257034 | -3.203806718 | 0.919049794  |
| C                               | -0.716072235 | -1.877631752 | 1.467597235  | C                               | -1.264082878 | -1.802945974 | 1.120439019  |
| C                               | -1.451135401 | -1.375602692 | 2.546313249  | C                               | -1.337112106 | -1.700956775 | 2.505636403  |
| O                               | -1.558439378 | -2.225498643 | 3.586093300  | O                               | -1.833427541 | -2.826709175 | 3.112794347  |
| C                               | -0.925531640 | -3.371731236 | 3.165690508  | C                               | -1.956608407 | -3.738256469 | 2.109996535  |
| C                               | 0.540778434  | -1.785772980 | -0.691574441 | C                               | -0.031787918 | -1.303022893 | -0.655260204 |
| C                               | -0.366431526 | -1.206747941 | 0.277473306  | C                               | -1.159601507 | -0.734117741 | 0.096893036  |
| H                               | 1.471111524  | -2.249354281 | -0.363134860 | H                               | 0.965140587  | -1.452838410 | -0.210958910 |
| H                               | -0.729458064 | -0.187579699 | 0.145398124  | H                               | -0.800632002 | 0.177290734  | 0.597390563  |
| F                               | -1.956454426 | -0.715543556 | -2.297265068 | F                               | -2.491085978 | -1.438704491 | -2.702263941 |
| F                               | -1.168164530 | -0.894027855 | -5.226907754 | F                               | -1.452177535 | -3.168033245 | -4.970149399 |
| F                               | 2.454745687  | -2.385079070 | -3.053337344 | F                               | 2.030985915  | -2.880952193 | -2.211363293 |
| F                               | 0.230976353  | -4.156707637 | 1.221841838  | F                               | -1.558837035 | -3.841541236 | -0.265143279 |
| F                               | -0.987084111 | -4.378743427 | 3.999117032  | F                               | -2.152590231 | -4.984687607 | 2.493730511  |
| F                               | -1.859657530 | -0.154993664 | 2.783771938  | F                               | -1.475448204 | -0.604897303 | 3.235290854  |

  

| 8.06 degrees of torsion angle |              |              |              |
|-------------------------------|--------------|--------------|--------------|
| C                             | 0.002731150  | -2.610355268 | -1.882120949 |
| C                             | -1.262519834 | -3.016550546 | -2.451390990 |
| C                             | -0.997992236 | -3.791272907 | -3.515854691 |
| O                             | 0.337582659  | -3.920962199 | -3.690125442 |
| C                             | 0.897100656  | -3.200310094 | -2.712531771 |
| C                             | -2.071191820 | -3.378737516 | 0.802407493  |
| C                             | -1.558785791 | -2.028642921 | 0.870089586  |
| C                             | -2.440110891 | -1.425555721 | 1.705031309  |
| O                             | -3.421946130 | -2.227603966 | 2.130221215  |
| C                             | -3.174379299 | -3.432409997 | 1.566177933  |
| C                             | 0.324360474  | -1.712822017 | -0.791491770 |
| C                             | -0.360316384 | -1.424808182 | 0.324506351  |
| H                             | 1.257883642  | -1.176550433 | -0.926818057 |
| H                             | 0.050781990  | -0.632992187 | 0.942077473  |
| F                             | -2.458065149 | -2.653056244 | -2.023073345 |
| F                             | -1.746171698 | -4.408107392 | -4.386898500 |
| F                             | 2.201662132  | -3.189920581 | -2.716546413 |
| F                             | -1.524779630 | -4.383471530 | 0.141466789  |
| F                             | -4.013359470 | -4.383152025 | 1.868168352  |
| F                             | -2.496560834 | -0.202784300 | 2.156316033  |

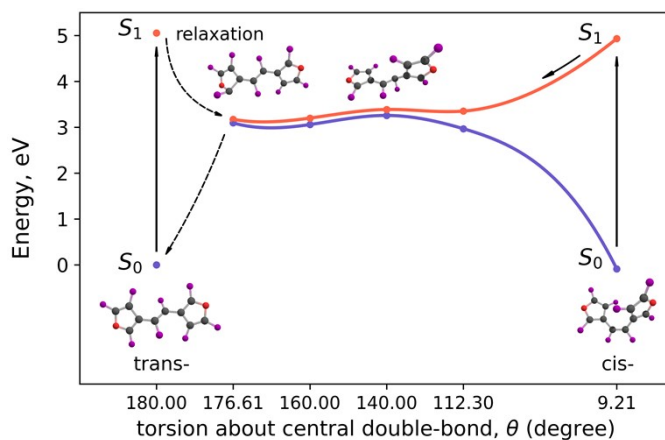

Fig. S2. Schematic representation of  $S_1$  surface of 8F-3DFE along the E/Z photoisomerization path (XMCQDPT2 data).

**Table S4.** Cartesian coordinates of the key points in the  $S_1$  state of 8F-3DFE, see Fig. S2.

| 180.00 degrees of torsion angle |              |              | 176.61 degrees of torsion angle |   |              |              |              |
|---------------------------------|--------------|--------------|---------------------------------|---|--------------|--------------|--------------|
| C                               | 0.441246079  | -1.290628497 | -2.088949487                    | C | 0.480977972  | -1.334344051 | -2.015920647 |
| C                               | -0.352007251 | -0.320363303 | -2.810808696                    | C | -0.066618395 | -0.275467301 | -2.740207080 |
| C                               | 0.183307175  | -0.209809034 | -4.038071155                    | C | 0.723271129  | -0.102583762 | -3.884700316 |
| O                               | 1.251181816  | -1.030562604 | -4.169612886                    | O | 1.771512579  | -0.918970366 | -3.981147951 |
| C                               | 1.377519871  | -1.659393239 | -2.998699242                    | C | 1.303531893  | -2.044417541 | -3.120787807 |
| C                               | 0.491831692  | -2.668362226 | 2.393522944                     | C | 0.650179338  | -2.422134569 | 2.506378840  |
| C                               | -0.301419890 | -1.698094830 | 1.671664877                     | C | -0.357403670 | -1.751880241 | 1.707746305  |
| C                               | -1.237697183 | -1.329334440 | 2.581412783                     | C | -1.400438038 | -1.600765362 | 2.587524561  |
| O                               | -1.111362087 | -1.958168879 | 3.752324700                     | O | -1.149351798 | -2.105870909 | 3.812467632  |
| C                               | -0.043486381 | -2.778921148 | 3.620783398                     | C | 0.118125979  | -2.606339405 | 3.741908959  |
| C                               | 0.286424300  | -1.818560457 | -0.751671479                    | C | 0.396688401  | -1.815773715 | -0.701954708 |
| C                               | -0.146598308 | -1.170162926 | 0.334386827                     | C | -0.329547267 | -1.289620209 | 0.344745469  |
| F                               | 0.627374373  | -3.107350932 | -0.623329666                    | F | 1.106761350  | -2.921212924 | -0.430845505 |
| F                               | -0.487548124 | 0.118627620  | 0.206045088                     | F | -1.113404221 | -0.235624233 | 0.080449620  |
| F                               | -0.123578860 | 0.494105391  | -5.089592349                    | F | 0.433216583  | 0.655079731  | -4.907264550 |
| F                               | -1.423390807 | 0.300428195  | -2.363568306                    | F | -1.123826304 | 0.490357833  | -2.510826062 |
| F                               | 2.363815966  | -2.502760455 | -2.933402881                    | F | 0.433477768  | -2.759316965 | -3.875664295 |
| F                               | 1.563218194  | -3.289149868 | 1.946284244                     | F | 1.880945845  | -2.732321697 | 2.131564123  |
| F                               | 0.263398130  | -3.482837559 | 4.672303707                     | F | 0.586161513  | -3.122292802 | 4.849410246  |
| F                               | -2.223994368 | -0.485968551 | 2.516115927                     | F | -2.590709252 | -1.080307485 | 2.440264121  |

  

| 160.00 degrees of torsion angle |              |              | 140.00 degrees of torsion angle |   |              |              |              |
|---------------------------------|--------------|--------------|---------------------------------|---|--------------|--------------|--------------|
| C                               | 0.408935129  | -1.274762353 | -2.002780676                    | C | 0.223338804  | -1.598401258 | -2.005836708 |
| C                               | -0.580994011 | -0.780591587 | -2.852875340                    | C | -0.946607155 | -1.419218909 | -2.861786453 |
| C                               | 0.044559206  | -0.419297688 | -4.051814627                    | C | -0.540836535 | -1.694335982 | -4.121131327 |
| O                               | 1.365039200  | -0.578173290 | -4.073127286                    | O | 0.814237117  | -2.043965007 | -4.144934518 |
| C                               | 1.527487941  | -1.622948401 | -3.009782413                    | C | 1.225696345  | -1.977587198 | -2.901631758 |
| C                               | -0.101041977 | -2.960242416 | 2.207108072                     | C | -0.815345598 | -3.137614372 | 1.597106263  |
| C                               | -0.547879277 | -1.692384623 | 1.664572616                     | C | -0.746497501 | -1.704245633 | 1.508094589  |
| C                               | -1.186456436 | -1.106351561 | 2.730848828                     | C | -0.915658577 | -1.318439912 | 2.813173643  |
| O                               | -1.180485124 | -1.865879183 | 3.845457172                     | O | -1.172971199 | -2.370627328 | 3.663665733  |
| C                               | -0.506662608 | -3.002167629 | 3.502512934                     | C | -1.107325507 | -3.477023289 | 2.882320832  |
| C                               | 0.503335153  | -1.492225160 | -0.625011893                    | C | 0.369889770  | -1.451760807 | -0.625468470 |
| C                               | -0.426179667 | -1.151350838 | 0.341228082                     | C | -0.718257700 | -0.951219633 | 0.252268634  |
| F                               | 1.584723584  | -2.159544228 | -0.194462002                    | F | -2.151208869 | -1.061373756 | -2.510240179 |
| F                               | -1.391610397 | -0.294935382 | -0.025104239                    | F | -1.113069302 | -1.706191360 | -5.284776773 |
| F                               | -0.556593602 | -0.094437940 | -5.163649348                    | F | 2.460270918  | -2.267720693 | -2.700610388 |
| F                               | -1.887924427 | -0.651315567 | -2.673916411                    | F | -0.604707425 | -3.960605947 | 0.551090224  |
| F                               | 1.192618490  | -2.799189400 | -3.595147977                    | F | -1.105163834 | -4.634415125 | 3.516179466  |
| F                               | 0.516165180  | -3.927106217 | 1.547229315                     | F | -1.187230337 | -0.136613027 | 3.340228741  |
| F                               | -0.407035900 | -3.906784807 | 4.442196961                     | F | 1.590172023  | -1.685764795 | -0.196573541 |
| F                               | -1.782818852 | 0.050183606  | 2.855401145                     | F | -0.155092761 | 0.370955089  | 0.462473262  |

  

| 112.30 degrees of torsion angle |              |              | 9.31 degrees of torsion angle |   |              |              |              |
|---------------------------------|--------------|--------------|-------------------------------|---|--------------|--------------|--------------|
| C                               | -0.095173457 | -1.901932373 | -1.972679296                  | C | 1.650629298  | -2.233406465 | -0.952514241 |
| C                               | -1.233266972 | -1.931554996 | -2.886620149                  | C | 2.916894132  | -2.192946948 | -0.257967196 |
| C                               | -0.845990682 | -2.660476451 | -3.956241842                  | C | 3.879539304  | -2.376433302 | -1.176466177 |
| O                               | 0.463505472  | -3.123399531 | -3.799945540                  | O | 3.336743965  | -2.540769847 | -2.404829849 |
| C                               | 0.874861954  | -2.654443864 | -2.643216787                  | C | 2.014472533  | -2.450611714 | -2.239827594 |
| C                               | -1.674498905 | -3.269954941 | 1.037928257                   | C | 1.403609424  | 0.797373333  | 0.466016526  |
| C                               | -1.281919554 | -1.888523164 | 1.179007040                   | C | 0.587223370  | -0.203457832 | 1.113474474  |
| C                               | -1.295081677 | -1.720232849 | 2.557423801                   | C | 0.583545469  | 0.195623496  | 2.408624913  |
| O                               | -1.795631537 | -2.810388186 | 3.225758044                   | O | 1.297283536  | 1.304590345  | 2.619577880  |
| C                               | -1.991097020 | -3.753993033 | 2.267610024                   | C | 1.799418142  | 1.661605150  | 1.414986339  |
| C                               | 0.009945289  | -1.383264649 | -0.681311691                  | C | 0.308374685  | -2.148659725 | -0.419149134 |
| C                               | -1.161523345 | -0.931220471 | 0.080455541                   | C | -0.128460261 | -1.319363536 | 0.533952179  |
| F                               | -2.391547298 | -1.344501125 | -2.740159140                  | F | -0.556051687 | -3.025349708 | -0.941761752 |
| F                               | -1.403391930 | -3.007823457 | -5.075812182                  | F | -1.366075468 | -1.496007288 | 1.009545539  |
| F                               | 2.057251243  | -3.008829500 | -2.282767158                  | F | 5.178431134  | -2.438128288 | -1.116487176 |
| F                               | -1.707752383 | -3.941033165 | -0.125703710                  | F | 3.079766155  | -2.031314578 | 1.041338608  |
| F                               | -2.250109977 | -4.970195501 | 2.702989014                   | F | 1.314654271  | -2.589913914 | -3.324921799 |
| F                               | -1.325831928 | -0.615202816 | 3.276833563                   | F | 1.678539400  | 0.853612800  | -0.823200449 |
| F                               | 1.227797833  | -1.524235237 | -0.161458576                  | F | 2.530270482  | 2.738686319  | 1.400827190  |
| F                               | -0.952003757 | 0.389615653  | 0.518553587                   | F | 0.012743925  | -0.299565664 | 3.464806798  |
